# Supplementary material for: An empirical model of the thermospheric mass density derived from CHAMP satellite
Source: Copernicus journal article supplement (doi:10.5194/angeo-36-1141-2018), 2018-08-24
Supplement: Supplementary file 1 [file angeo-36-1141-2018-supplement.zip]

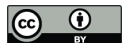

## *Supplement of*

# **An empirical model of the thermospheric mass density derived from CHAMP satellite**

**Chao Xiong et al.**

*Correspondence to:* Chao Xiong ([chao.xiong@gfz-potsdam.de](mailto:chao.xiong@gfz-potsdam.de))

- [angeo-36-1141-2018-supplement-title-page.pdf](#)
- [P107\\_list\\_2000-2010.dat](#)
- [merging\\_electric\\_field\\_list\\_2000-2010.dat](#)

The copyright of individual parts of the supplement might differ from the CC BY 4.0 License.
